# Supplementary material for: Association of RAB5 overexpression in pancreatic cancer with cancer progression and poor prognosis via E-cadherin suppression
Source: PubMed Central journal article supplement (PMC5355344; doi:10.18632/oncotarget.14703), 2017-01-17
Supplement: oncotarget-08-12290-s001.pdf [file oncotarget-08-12290-s001.pdf]

## Association of RAB5 overexpression in pancreatic cancer with cancer progression and poor prognosis via E-cadherin suppression

### SUPPLEMENTARY FIGURES AND TABLE

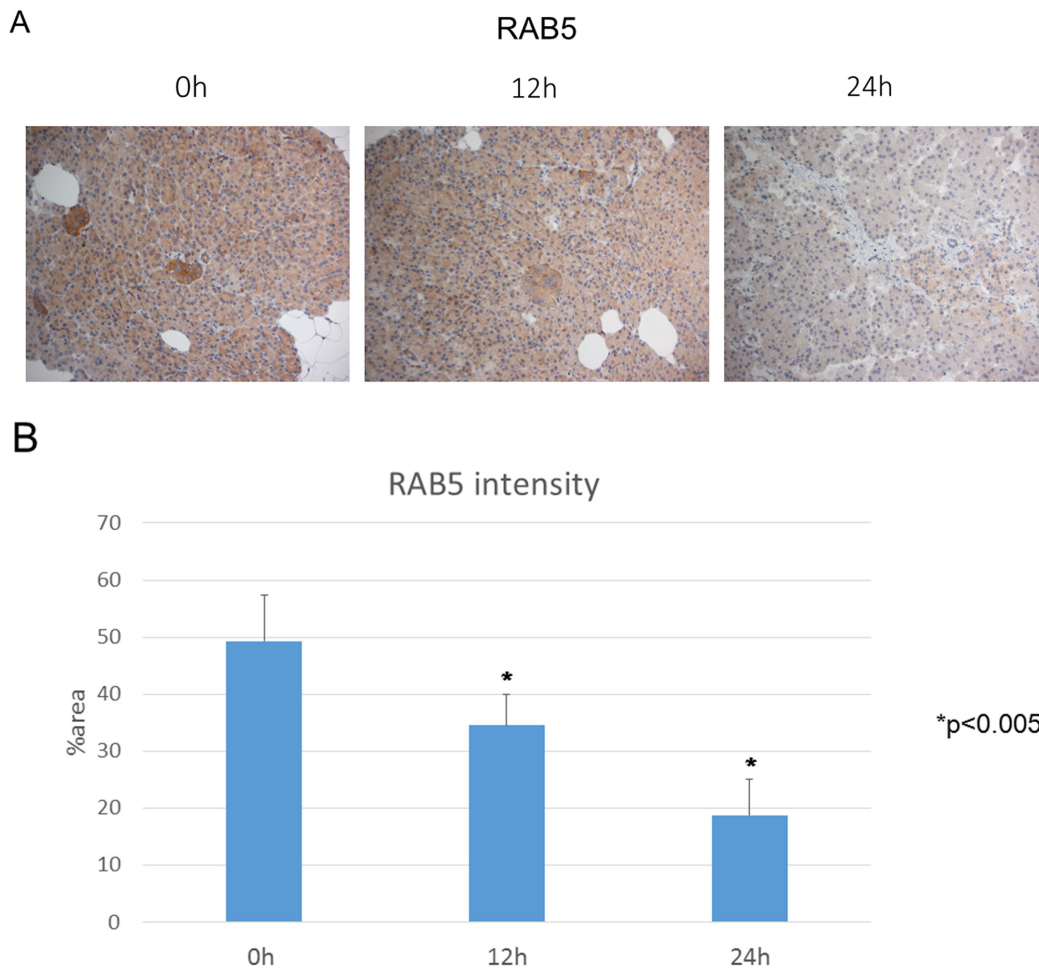

**Supplementary Figure 1: Immunohistochemical staining of RAB5 in normal pancreatic tissue according to unfixed interval.** **A.** Examples of RAB5 expression in normal pancreatic specimens: 0 h, 12 h, and 24 h elapsing between resection and formalin fixation (200×). **B.** Quantitative analysis of RAB5 expression in normal pancreatic specimens. Quantification of RAB5-positive area was performed in each normal pancreatic tissue after DAB staining. DAB-positive areas were measured using Image J 1.44 image analysis software (National Institute of Health, Bethesda, MA, USA). The amount of RAB5-positive area was calculated from 10 randomized and nonoverlapping areas (200×) (\**P* < 0.05).

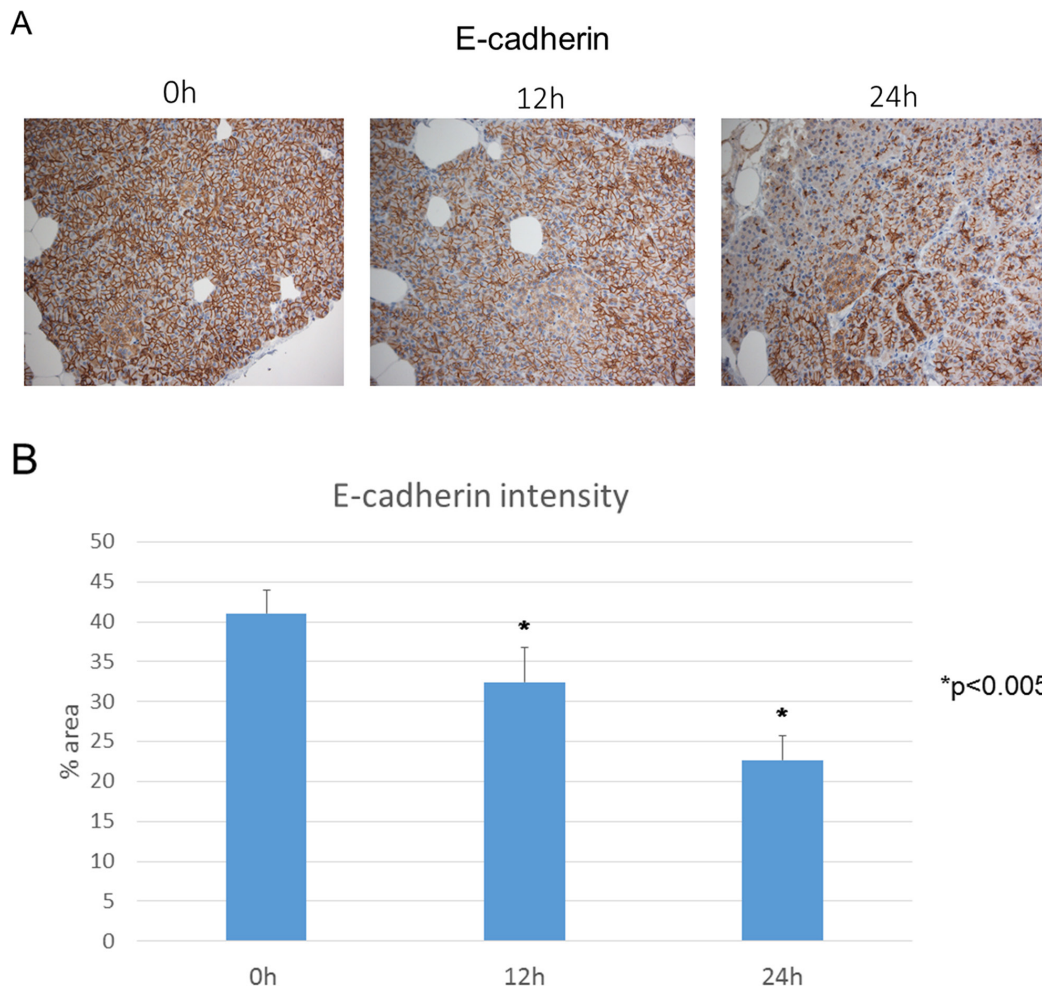

**Supplementary Figure 2: Immunohistochemical staining of E-cadherin in normal pancreatic tissue according to unfixed interval.** **A.** Examples of E-cadherin expression in normal pancreatic specimens: 0 h, 12 h, and 24 h elapsing between resection and formalin fixation (200×). **B.** Quantitative analysis of E-cadherin expression in normal pancreatic specimens. Quantification of E-cadherin-positive area was measured using Image J 1.44 image analysis software (National Institute of Health, Bethesda, MA, USA). The amount of E-cadherin-positive area was calculated from 10 randomized and non-overlapping areas (200×) (\* $P < 0.05$ ).

**Supplementary Table 1: Evaluation scores of RAB5 and E-cadherin defined by subtracting the tumor center score from the peri-frontal area score**

| Score | Number of patients |            |
|-------|--------------------|------------|
|       | RAB5               | E-cadherin |
| -2    | 0                  | 3          |
| -1    | 5                  | 45         |
| 0     | 45                 | 60         |
| 1     | 39                 | 3          |
| 2     | 15                 | 0          |
| 3     | 7                  | 0          |

\*Bold lines indicate that cut-off scores of the high expression group and low expression group.
